# Supplementary material
Source: MDPI journal article supplement (https://www.mdpi.com/2072-4292/12/20/3380)
Supplement: s1 [file s1]

## Supplementary Materials

Data set in Table 4 was used to match with Landsat-8 images with derived DOC concentration. We applied the selected exponential algorithm to Landsat-8 images.

Table 4. The table shows sampling trips from 4/3/2017 to 12/3/2017 in the study area. There are a total of 63 stations, some of the stations with very high DOC concentration are samples from inland. This data set is used to match with Landsat-8 images with derived DOC concentration (derived from the selected exponential algorithm).

| Rivers   | Date      | No. Station | DOC $\mu\text{M}$   | time           |
|----------|-----------|-------------|---------------------|----------------|
| Rajang   | 4/3/2017  | 1           | 32585               | 15:32          |
| Rajang   | 5/3/2017  | 4           | 169.3 $\pm$ 31.7    | 9:00 to 17:43  |
| Rajang   | 6/3/2017  | 6           | 133.5 $\pm$ 29.7    | 9:46 to 18:24  |
| Rajang   | 7/3/2017  | 2           | 124.8 $\pm$ 59.0    | 6:05 to 9:57   |
| Sebuyau  | 11/3/2017 | 11          | 940.95 $\pm$ 753.5  | 9:33 to 14:47  |
| Maludam  | 9/3/2017  | 8           | 3405.7 $\pm$ 1344.5 | 10:07 to 16:51 |
| Simunjan | 12/3/2017 | 5           | 2229.6 $\pm$ 918.8  | 9:00 to 14:00  |
| Sematan  | 9/3/2017  | 6           | 157.5 $\pm$ 49.5    | 10:25 to 13:25 |
| Samunsam | 11/3/2017 | 10          | 325.9 $\pm$ 371.8   | 8:24 to 13:56  |
| Talang   | 10/3/2017 | 10          | 101.9 $\pm$ 13.9    | 8:34 to 13:21  |
